# Supplementary material for: A Comprehensive analysis of Gender, Racial, and Geographic Disparities in Septicemia Mortality in the United States (1999–2020) Using CDC WONDER Data
Source: Research Square preprint supplement (doi:10.21203/rs.3.rs-6172209/v1), 2025-03-26
Supplement: Supplementary file 1 [file 426f8038d6fc319b4fd65c52.docx]

**Supplemental Table 1** Septicemia –related Deaths, Stratified by Sex and Race, in the United States, 1999 to 2020.

| **Deaths** | | | | | | | | | |
| --- | --- | --- | --- | --- | --- | --- | --- | --- | --- |
| **Year** | **Overall** | **Women** | **Men** | **NH White** | **NH Black or African American** | **NH Asian or Pacific Islander** | **NH American Indian or Alaska Native** | **Hispanic or Latino** | **Population** |
| 1999 | 137397 | 73917 | 63480 | 101855 | 24387 | 2313 | 744 | 7622 | 180408769 |
| 2000 | 135856 | 73409 | 62447 | 101196 | 23699 | 2312 | 717 | 7433 | 181984640 |
| 2001 | 138371 | 74803 | 63568 | 102844 | 23819 | 2448 | 729 | 8073 | 184305128 |
| 2002 | 141585 | 76159 | 65426 | 105245 | 23941 | 2693 | 801 | 8441 | 186208028 |
| 2003 | 143754 | 77172 | 66582 | 106894 | 24103 | 2696 | 873 | 8806 | 188090429 |
| 2004 | 144105 | 76969 | 67136 | 107125 | 23765 | 2912 | 844 | 9119 | 190205384 |
| 2005 | 150906 | 80221 | 70685 | 111975 | 24538 | 3165 | 917 | 9994 | 192551384 |
| 2006 | 150767 | 79862 | 70905 | 111556 | 24362 | 3382 | 906 | 10258 | 195019359 |
| 2007 | 150844 | 79508 | 71336 | 111153 | 24478 | 3487 | 1022 | 10451 | 197403777 |
| 2008 | 157631 | 83334 | 74297 | 116591 | 24667 | 3773 | 1100 | 11190 | 199795090 |
| 2009 | 155788 | 81670 | 74118 | 114995 | 24007 | 3780 | 1202 | 11488 | 202107016 |
| 2010 | 158097 | 82448 | 75649 | 116857 | 24032 | 3916 | 1157 | 11803 | 203891983 |
| 2011 | 163420 | 85557 | 77863 | 120955 | 24416 | 4097 | 1245 | 12384 | 206592936 |
| 2012 | 163765 | 84752 | 79013 | 120755 | 24084 | 4292 | 1283 | 12796 | 208826037 |
| 2013 | 172318 | 89011 | 83307 | 126535 | 25524 | 4766 | 1379 | 13603 | 211085314 |
| 2014 | 180905 | 92776 | 88129 | 132919 | 26163 | 4871 | 1521 | 14693 | 213809280 |
| 2015 | 193873 | 98825 | 95048 | 142408 | 27972 | 5385 | 1620 | 15606 | 216553817 |
| 2016 | 196633 | 99610 | 97023 | 143874 | 28374 | 5637 | 1681 | 16406 | 218641417 |
| 2017 | 202446 | 102176 | 100270 | 147520 | 28897 | 6034 | 1775 | 17548 | 221447331 |
| 2018 | 204714 | 102356 | 102358 | 148529 | 29731 | 6120 | 1707 | 18041 | 223311190 |
| 2019 | 199988 | 99303 | 100685 | 145001 | 28968 | 6143 | 1684 | 17734 | 224981167 |
| 2020 | 241176 | 116517 | 124659 | 164716 | 38021 | 8222 | 2400 | 27258 | 226635013 |
| **Total** | **3,684,339** | **1,910,355** | **1,773,984** | **2,701,498** | **571,948** | **92,444** | **27,307** | **280,747** | **4473854489** |
| NH, non-Hispanic. |  |  |  |  |  |  |  |  |  |
|  |  |  |  |  |  |  |  |  |  |

**Supplemental Table 2** Septicemia –related Mortality, Stratified by Place of Death in the United States, 1999 to 2020.

| **Deaths** | | | | | |  |  |  |  |
| --- | --- | --- | --- | --- | --- | --- | --- | --- | --- |
| **Year** | **Medical Facility - Inpatient** | **Medical Facility - Outpatient or ER** | **Medical Facility - Dead on Arrival** | **Medical Facility - Status unknown** | **Decedent's home** | **Nursing home/long term care** | **Other** | **Place of death unknown** | **Total** |
| **1999** | **111553** | **3532** | **252** | **962** | **3496** | **16567** | **998** | **37** | **137397** |
| **2000** | **110622** | **3505** | **234** | **1068** | **3401** | **15998** | **981** | **47** | **135856** |
| **2001** | **113421** | **3784** | **227** | **1016** | **3415** | **15306** | **1173** | **29** | **138371** |
| **2002** | **116783** | **3913** | **209** | **1129** | **3476** | **14605** | **1424** | **46** | **141585** |
| **2003** | **118887** | **4120** | **176** | **3609** | **93** | **14652** | **1595** | **622** | **143754** |
| **2004** | **119344** | **4027** | **156** | **3988** | **260** | **13840** | **1936** | **554** | **144105** |
| **2005** | **124059** | **4452** | **166** | **4322** | **783** | **14620** | **1873** | **631** | **150906** |
| **2006** | **125141** | **4414** | **128** | **4229** | **1320** | **13436** | **1659** | **440** | **150767** |
| **2007** | **125472** | **4323** | **140** | **4260** | **1980** | **12848** | **1622** | **199** | **150844** |
| **2008** | **129236** | **4304** | **140** | **4309** | **2537** | **12257** | **1644** | **3204** | **157631** |
| **2009** | **125526** | **4388** | **101** | **4314** | **2883** | **11877** | **1795** | **4904** | **155788** |
| **2010** | **130740** | **4533** | **117** | **4640** | **3851** | **11961** | **2107** | **148** | **158097** |
| **2011** | **133974** | **4655** | **116** | **5184** | **4771** | **12269** | **2312** | **139** | **163420** |
| **2012** | **133084** | **4793** | **102** | **5345** | **5891** | **11959** | **2451** | **140** | **163765** |
| **2013** | **139750** | **5074** | **161** | **5889** | **6414** | **12073** | **2811** | **146** | **172318** |
| **2014** | **145992** | **5391** | **111** | **6487** | **8333** | **12576** | **1882** | **133** | **180905** |
| **2015** | **155153** | **5744** | **108** | **7097** | **10541** | **13486** | **1669** | **75** | **193873** |
| **2016** | **155933** | **5987** | **109** | **8124** | **11295** | **13377** | **1787** | **21** | **196633** |
| **2017** | **159320** | **6391** | **111** | **8554** | **12706** | **13557** | **1777** | **30** | **202446** |
| **2018** | **161235** | **6483** | **98** | **9015** | **12902** | **13183** | **1758** | **40** | **204714** |
| **2019** | **157401** | **6636** | **77** | **8981** | **12832** | **12111** | **1922** | **28** | **199988** |
| **2020** | **191402** | **8438** | **121** | **12971** | **13167** | **12465** | **2577** | **35** | **241176** |
| **Total** | **2984028** | **108887** | **3160** | **115493** | **126347** | **295023** | **39753** | **11648** | **3684339** |

**Supplemental Table 3** Annual percent change (APC) of Septicemia –related Age-Adjusted Mortality Rates per 100,000 in the United States, 1999 to 2020.

| **Year Interval** | **APC (95% CI)** |
| --- | --- |
| **Overall** | |
| 1999-2012 | -0.36 ( -1.77 to 0.14) |
| 2012-2020 | 1.77* (0.78 to 5.16) |
| **Male** | |
| 1999-2012 | -0.52 (-1.83 to 0.10) |
| 2012-2020 | 2.15* (1.07 to 5.46) |
| **Female** | |
| 1999-2012 | -0.32 (-2.35 to 0.25) |
| 2012-2020 | 1.34* (0.47 to 4.65) |
| **NH White** | |
| 1999-2011 | 0.07 (-1.29 to 0.54) |
| 2012-2020 | 1.70* (1.04 to 3.90) |
| **NH Black or African American** | |
| 1999-2018 | -1.81* (-2.28 to -1.46) |
| 2018-2020 | 10.70* (2.57 to 14.59) |
| **NH American Indian or Alaska Native** | |
| 1999-2020 | 1.55* (1.04 to 2.19) |
| **Hispanic or Latino** | |
| 1999-2018 | -0.78* (-1.97 to -0.06) |
| 2018-2020 | 15.80* (2.97 to 21.36) |
| **NH Asian or Pacific Islander** | |
| 1999-2018 | -0.76* (-1.98 to -0.21) |
| 2018-2020 | 7.81 (-0.12 to 11.49) |
| **Northeast region** | |
| 1999-2012 | -1.23* (-3.18 to -0.71) |
| 2012-2020 | 0.64 (-0.30 to 4.16) |
| **Midwest region** | |
| 1999-2013 | -0.01 (0.97 to 0.45) |
| 2013-2020 | 2.57* (1.41 to 5.96) |
| **South region** | |
| 1999-2012 | -0.50 (-2.11 to 0.16) |
| 2012-2020 | 2.07* (0.99 to 5.59) |
| **West region** | |
| 1999-2020 | 0.91* (0.62 to 1.2) |
| **Metropolitan Areas** | |
| 1999-2012 | -0.6* (-2.09 to -1.0) |
| 2012-2020 | 1.49* (0.49 to 4.95) |
| **Nonmetropolitan Areas** | |
| 1999-2010 | 0.52 (-0.99 to 1.22) |
| 2010-2020 | 2.81* (2.16 to 4.28) |
| APC = annual percent change; NH = non-Hispanic; * Indicates that the annual percentage change (APC) is significantly different from zero at α = 0.05. AAMR = age-adjusted mortality rate. |  |

**Supplemental Table 4** Overall and Sex‐Stratified Septicemia –related Age-Adjusted Mortality Rates per 100,000 in the United States, 1999 to 2020.

| **Age-Adjusted Rate (95% CI)** | | | |
| --- | --- | --- | --- |
| **Year** | **Male** | **Female** | **Overall** |
| **1999** | **89.9 (89.2 - 90.6)** | **69.5 (69.0-70.0)** | **77.8 (77.4-78.2)** |
| **2000** | **87.2(86.5-87.9)** | **68.2(67.7-68.7)** | **76(75.6-76.4)** |
| **2001** | **86.7(86-87.4)** | **68.7(68.2-69.2)** | **76.1(75.7-76.5)** |
| **2002** | **87.5(86.8-88.2)** | **69.1(68.6-69.6)** | **76.7(76.3-77.1)** |
| **2003** | **87.1(86.4-87.8)** | **69.2(68.7-69.7)** | **76.5(76.1-76.9)** |
| **2004** | **86(85.3-86.6)** | **68.2(67.7-68.7)** | **75.5(75.1-75.9)** |
| **2005** | **88.4(87.8-89.1)** | **69.9(69.4-70.4)** | **77.6(77.2-78)** |
| **2006** | **86.5(85.9-87.2)** | **68.6(68.1-69.1)** | **76(75.6-76.4)** |
| **2007** | **84.9(84.3-85.5)** | **67.1(66.7-67.6)** | **74.6(74.2-74.9)** |
| **2008** | **86.3(85.7-86.9)** | **69.2(68.7-69.7)** | **76.3(75.9-76.7)** |
| **2009** | **83.9(83.3-84.5)** | **66.9(66.4-67.3)** | **74(73.6-74.4)** |
| **2010** | **84.1(83.5-84.7)** | **66.4(65.9-66.8)** | **73.8(73.4-74.2)** |
| **2011** | **83.8(83.2-84.4)** | **67.3(66.9-67.8)** | **74.3(73.9-74.7)** |
| **2012** | **82.5(82-83.1)** | **65.4(64.9-65.8)** | **72.7(72.3-73)** |
| **2013** | **84.5(83.9-85.1)** | **67.5(67-67.9)** | **74.8(74.4-75.1)** |
| **2014** | **86.9(86.3-87.4)** | **69(68.5-69.4)** | **76.6(76.3-77)** |
| **2015** | **91.4(90.8-92)** | **72(71.5-72.5)** | **80.3(79.9-80.7)** |
| **2016** | **91(90.4-91.6)** | **71.4(71-71.9)** | **79.9(79.5-80.2)** |
| **2017** | **91.8(91.2-92.3)** | **71.7(71.3-72.2)** | **80.4(80-80.7)** |
| **2018** | **91.3(90.7-91.9)** | **70.6(70.2-71.1)** | **79.5(79.2-79.9)** |
| **2019** | **87.8(87.2-88.3)** | **67.5(67-67.9)** | **76.2(75.9-76.6)** |
| **2020** | **105.9(105.3-106.5)** | **78.4(77.9-78.8)** | **90.5(90.1-90.8)** |
| **Total** | **88.3(88.2-88.5)** | **69.3(69.2-69.4)** | **77.3(77.2-77.4)** |

**Supplemental Table 5** Septicemia –related Age-Adjusted Mortality Rates per 100,000, Stratified by Race in the United States, 1999 to 2020.

| **Age-Adjusted Rate (95% CI)** | | | | | |
| --- | --- | --- | --- | --- | --- |
| **Year** | **NH White** | **NH Black or African American** | **NH American Indian or Alaska Native** | **Hispanic or Latino** | **NH Asian or Pacific Islander** |
| 1999 | 68.8 (68.4-69.2) | 160.4 (158.4-162.5) | 94.8 (87.4-102.2) | 83.8 (81.8-85.8) | 58.4 (55.9-60.9) |
| 2000 | 67.8 (67.3-68.2) | 155.0 (153.0-157.0) | 86.2 (79.5-93.0) | 78.1 (76.2-80) | 54.3 (52.0-56.7) |
| 2001 | 68.1 (67.7-68.5) | 152.5 (150.6-154.5) | 82.6 (76.2-89.0) | 80.7 (78.8-82.5) | 53.0 (50.8-55.2) |
| 2002 | 68.9 (68.5-69.3) | 151.2 (149.3-153.2) | 89.3 (82.6-95.9) | 79.9 (78.1-81.7) | 55.1 (52.9-57.3) |
| 2003 | 69.1 (68.7-69.6) | 148.9 (147.0-150.8) | 93.7 (87.0-100.4) | 78.7 (77-80.5) | 52.3 (50.3-54.4) |
| 2004 | 68.5 (68.1-69.0) | 144.1 (142.2-146.0) | 86.2 (80.0-92.5) | 78.1 (76.4-79.8) | 54.1 (52.0-56.1) |
| 2005 | 70.6 (70.2-71.0) | 145.3 (143.4-147.2) | 92.7 (86.2-99.2) | 81.3 (79.6-83) | 54.5 (52.5-56.4) |
| 2006 | 69.3 (68.9-69.7) | 140.2 (138.4-142.0) | 88.8 (82.6-95.1) | 78.4 (76.8-80) | 54.8 (52.9-56.7) |
| 2007 | 68.0 (67.6-68.4) | 137.3 (135.5-139.0) | 96.8 (90.4-103.2) | 76.3 (74.7-77.8) | 54.2 (52.4-56.1) |
| 2008 | 70.3 (69.9-70.7) | 134.8 (133.0-136.5) | 102.4 (95.9-108.9) | 77.6 (76.1-79.2) | 55.3 (53.5-57.1) |
| 2009 | 68.4 (68.0-68.8) | 127.1 (125.5-128.8) | 110.0 (103.4-116.7) | 74.8 (73.4-76.3) | 52.4 (50.7-54.1) |
| 2010 | 68.6 (68.2-69.0) | 124.3 (122.7-126.0) | 100.8 (94.6-107.1) | 74.8 (73.3-76.2) | 52.5 (50.8-54.2) |
| 2011 | 69.6 (69.2-70.0) | 122.1 (120.5-123.7) | 102.6 (96.5-108.7) | 73 (71.6-74.3) | 50.6 (49.0-52.1) |
| 2012 | 68.3 (67.9-68.7) | 116.2 (114.7-117.7) | 101.9 (95.9-107.8) | 71.4 (70.1-72.7) | 49.8 (48.2-51.3) |
| 2013 | 70.5 (70.1-70.8) | 119.1 (117.6-120.6) | 102.4 (96.7-108.1) | 72.2 (70.9-73.4) | 51.5 (50.0-53.0) |
| 2014 | 72.9 (72.5-73.3) | 117.9 (116.4-119.3) | 110.0 (104.2-115.8) | 73 (71.7-74.2) | 49.2 (47.8-50.6) |
| 2015 | 76.9 (76.5-77.3) | 121.9 (120.4-123.3) | 112.3 (106.6-118.1) | 73.6 (72.4-74.8) | 50.7 (49.4-52.1) |
| 2016 | 76.7 (76.3-77.1) | 119.7 (118.3-121.1) | 111.7 (106.1-117.2) | 73.5 (72.4-74.7) | 50.4 (49.0-51.7) |
| 2017 | 77.4 (77.0-77.8) | 118.0 (116.6-119.4) | 114.4 (108.9-119.9) | 74.9 (73.7-76) | 50.9 (49.6-52.2) |
| 2018 | 76.7 (76.3-77.1) | 118.0 (116.6-119.3) | 104.6 (99.5-109.8) | 73.4 (72.3-74.5) | 49.1 (47.8-50.3) |
| 2019 | 73.9 (73.6-74.3) | 111.6 (110.3-112.9) | 100.1 (95.2-105.0) | 69.2 (68.2-70.3) | 47.0 (45.8-48.2) |
| 2020 | 83.3 (82.9-83.8) | 142.5 (141.0-144.0) | 136.3 (130.7-142.0) | 100 (98.8-101.3) | 59.5 (58.2-60.8) |
| TOTAL | 71.7 (71.6-71.8) | 131.2 (130.8-131.5) | 102.0 (100.7-103.2) | 76.8 (76.5-77.1) | 52.1 (51.7-52.4) |
| NH = non-Hispanic. |  |  |  |  |  |

**Supplemental Table 6** Septicemia –related Age-Adjusted Mortality Rates per 100,000, Stratified by States in the United States, 1999 to 2020.

| **State** | **Age-Adjusted Rate (95% CI)** |
| --- | --- |
| Alabama | 94.5 (93.8-95.2) |
| Alaska | 56.3 (54.3-58.2) |
| Arizona | 55.5 (55.0-56.0) |
| Arkansas | 93.8 (92.9-94.7) |
| California | 75.0 (74.7-75.2) |
| Colorado | 54.9 (54.3-55.4) |
| Connecticut | 76.5 (75.8-77.2) |
| Delaware | 81.8 (80.3-83.3) |
| District of Columbia | 135.4 (132.9-137.9) |
| Florida | 60.8 (60.6-61.1) |
| Georgia | 92.6 (92.0-93.1) |
| Hawaii | 52.8 (51.8-53.7) |
| Idaho | 49.8 (48.9-50.7) |
| Illinois | 82.8 (82.4-83.2) |
| Indiana | 80.4 (79.8-80.9) |
| Iowa | 54.6 (54.0-55.3) |
| Kansas | 64.2 (63.4-64.9) |
| Kentucky | 103.6 (102.9-104.4) |
| Louisiana | 104.0 (103.2-104.8) |
| Maine | 52.8 (51.9-53.7) |
| Maryland | 92.7 (92.1-93.4) |
| Massachusetts | 72.1 (71.6-72.6) |
| Michigan | 76.5 (76.0-76.9) |
| Minnesota | 43.4 (42.9-43.8) |
| Mississippi | 107.6 (106.6-108.6) |
| Missouri | 72.4 (71.9-72.9) |
| Montana | 49.5 (48.5-50.6) |
| Nebraska | 52.3 (51.5-53.2) |
| Nevada | 85.8 (84.8-86.7) |
| New Hampshire | 54.3 (53.3-55.3) |
| New Jersey | 103.6 (103.1-104.1) |
| New Mexico | 68.8 (67.8-69.7) |
| New York | 72.8 (72.5-73.1) |
| North Carolina | 87.0 (86.5-87.4) |
| North Dakota | 54.3 (52.9-55.7) |
| Ohio | 81.1 (80.7-81.6) |
| Oklahoma | 92.8 (92.0-93.6) |
| Oregon | 47.0 (46.4-47.5) |
| Pennsylvania | 79.5 (79.2-79.9) |
| Rhode Island | 81.9 (80.6-83.2) |
| South Carolina | 97.3 (96.6-98.0) |
| South Dakota | 57.4 (56.1-58.6) |
| Tennessee | 93.0 (92.3-93.6) |
| Texas | 96.2 (95.8-96.5) |
| Utah | 56.1 (55.2-56.9) |
| Vermont | 49.2 (47.9-50.5) |
| Virginia | 82.7 (82.2-83.3) |
| Washington | 61.6 (61.1-62.0) |
| West Virginia | 101.5 (100.4-102.6) |
| Wisconsin | 51.6 (51.1-52.0) |
| Wyoming | 58.3 (56.7-60.0) |

**Supplemental Table 7** Septicemia –related Age-Adjusted Mortality Rates per 100,000, Stratified by Census Region in the United States, 1999 to 2020.

| **Census Region** | **Year** | **Age-Adjusted Rate (95% CI)** |
| --- | --- | --- |
| Northeast | 1999 | 85.5 (84.5-86.4) |
| Northeast | 2000 | 84.7 (83.8-85.6) |
| Northeast | 2001 | 84 (83.1-84.9) |
| Northeast | 2002 | 83.8 (82.9-84.7) |
| Northeast | 2003 | 81.4 (80.5-82.3) |
| Northeast | 2004 | 81.9 (81-82.7) |
| Northeast | 2005 | 84 (83.1-84.9) |
| Northeast | 2006 | 81.3 (80.4-82.2) |
| Northeast | 2007 | 78.8 (78-79.7) |
| Northeast | 2008 | 78.6 (77.7-79.5) |
| Northeast | 2009 | 73.6 (72.7-74.4) |
| Northeast | 2010 | 74 (73.2-74.9) |
| Northeast | 2011 | 74.4 (73.6-75.2) |
| Northeast | 2012 | 71.9 (71.1-72.7) |
| Northeast | 2013 | 74.7 (73.9-75.5) |
| Northeast | 2014 | 76.4 (75.6-77.3) |
| Northeast | 2015 | 78.4 (77.5-79.2) |
| Northeast | 2016 | 76.8 (76-77.7) |
| Northeast | 2017 | 73.9 (73.2-74.7) |
| Northeast | 2018 | 73.9 (73.1-74.7) |
| Northeast | 2019 | 71 (70.3-71.8) |
| Northeast | 2020 | 82.6 (81.7-83.4) |
| Northeast | **TOTAL** | 78.2 (78.1-78.4) |
| Midwest | 1999 | 69.9 (69.1-70.7) |
| Midwest | 2000 | 67.7 (67-68.5) |
| Midwest | 2001 | 67.6 (66.8-68.4) |
| Midwest | 2002 | 68.7 (67.9-69.5) |
| Midwest | 2003 | 68.3 (67.5-69.1) |
| Midwest | 2004 | 67.1 (66.3-67.9) |
| Midwest | 2005 | 69.9 (69.1-70.6) |
| Midwest | 2006 | 67.7 (66.9-68.4) |
| Midwest | 2007 | 67.2 (66.5-68) |
| Midwest | 2008 | 70.4 (69.6-71.1) |
| Midwest | 2009 | 68.2 (67.4-68.9) |
| Midwest | 2010 | 67.3 (66.6-68) |
| Midwest | 2011 | 69.5 (68.8-70.3) |
| Midwest | 2012 | 67 (66.3-67.7) |
| Midwest | 2013 | 68.1 (67.4-68.9) |
| Midwest | 2014 | 70.8 (70-71.5) |
| Midwest | 2015 | 75 (74.2-75.7) |
| Midwest | 2016 | 73.5 (72.8-74.3) |
| Midwest | 2017 | 74.8 (74.1-75.6) |
| Midwest | 2018 | 75.3 (74.5-76) |
| Midwest | 2019 | 73.4 (72.6-74.1) |
| Midwest | 2020 | 86.8 (86.1-87.6) |
| Midwest | **TOTAL** | 70.9 (70.8-71.1) |
| South | 1999 | 87.6 (86.9-88.4) |
| South | 2000 | 85.6 (84.9-86.3) |
| South | 2001 | 86 (85.3-86.7) |
| South | 2002 | 86.7 (86-87.4) |
| South | 2003 | 86.9 (86.2-87.6) |
| South | 2004 | 85.1 (84.4-85.8) |
| South | 2005 | 87.1 (86.4-87.8) |
| South | 2006 | 85.2 (84.5-85.8) |
| South | 2007 | 83.4 (82.7-84) |
| South | 2008 | 85 (84.3-85.7) |
| South | 2009 | 83.3 (82.6-83.9) |
| South | 2010 | 82.5 (81.9-83.2) |
| South | 2011 | 81.7 (81.1-82.4) |
| South | 2012 | 81.3 (80.7-81.9) |
| South | 2013 | 83.5 (82.9-84.2) |
| South | 2014 | 85.6 (84.9-86.2) |
| South | 2015 | 89.9 (89.2-90.5) |
| South | 2016 | 89.8 (89.1-90.4) |
| South | 2017 | 91.1 (90.5-91.8) |
| South | 2018 | 90.7 (90.1-91.3) |
| South | 2019 | 86.1 (85.5-86.7) |
| South | 2020 | 102.6 (102-103.2) |
| South | **TOTAL** | 87 (86.8-87.1) |
| West | 1999 | 62 (61.2-62.8) |
| West | 2000 | 59.7 (58.9-60.5) |
| West | 2001 | 60.6 (59.8-61.4) |
| West | 2002 | 61.2 (60.4-61.9) |
| West | 2003 | 63 (62.2-63.8) |
| West | 2004 | 62.1 (61.4-62.9) |
| West | 2005 | 63.5 (62.7-64.2) |
| West | 2006 | 64.3 (63.5-65.1) |
| West | 2007 | 63.2 (62.5-64) |
| West | 2008 | 65.7 (64.9-66.4) |
| West | 2009 | 64.6 (63.9-65.4) |
| West | 2010 | 65.7 (64.9-66.4) |
| West | 2011 | 66.3 (65.6-67.1) |
| West | 2012 | 64.4 (63.7-65.1) |
| West | 2013 | 66.4 (65.7-67.2) |
| West | 2014 | 67.2 (66.5-67.9) |
| West | 2015 | 71 (70.2-71.7) |
| West | 2016 | 71.6 (70.9-72.4) |
| West | 2017 | 72.7 (72-73.5) |
| West | 2018 | 69.4 (68.7-70) |
| West | 2019 | 66.4 (65.8-67.1) |
| West | 2020 | 79.5 (78.8-80.2) |
| West | **TOTAL** | 66.6 (66.4-66.7) |

**Supplemental Table 8** Septicemia –related Age-Adjusted Mortality Rates per 100,000, Stratified by Urban-Rural Classification in the United States, 1999 to 2020.

| **Age-Adjusted Rate (95% CI)** | | |
| --- | --- | --- |
| **Year** | **Metropolitan** | **Nonmetropolitan** |
| 1999 | 79.4 (79-79.9) | 71 (70.1-71.9) |
| 2000 | 77.5 (77-77.9) | 69.6 (68.7-70.5) |
| 2001 | 77.2 (76.8-77.7) | 71.2 (70.3-72.1) |
| 2002 | 78 (77.5-78.4) | 71.1 (70.2-72) |
| 2003 | 77.6 (77.1-78) | 72 (71.1-72.9) |
| 2004 | 76.6 (76.2-77.1) | 70.8 (69.9-71.7) |
| 2005 | 78.5 (78-78.9) | 73.9 (73-74.8) |
| 2006 | 76.9 (76.5-77.4) | 72 (71.1-72.9) |
| 2007 | 75.3 (74.9-75.7) | 71.5 (70.7-72.4) |
| 2008 | 76.7 (76.3-77.1) | 75.1 (74.2-76) |
| 2009 | 74 (73.5-74.4) | 74.5 (73.6-75.4) |
| 2010 | 73.7 (73.3-74.1) | 74.6 (73.7-75.5) |
| 2011 | 73.9 (73.5-74.3) | 76.6 (75.8-77.5) |
| 2012 | 72.1 (71.7-72.4) | 76.1 (75.2-76.9) |
| 2013 | 73.8 (73.5-74.2) | 79.6 (78.7-80.5) |
| 2014 | 75.4 (75-75.8) | 83.2 (82.3-84.1) |
| 2015 | 78.6 (78.2-79) | 89.2 (88.3-90.2) |
| 2016 | 78.1 (77.7-78.5) | 89.3 (88.3-90.2) |
| 2017 | 78.5 (78.2-78.9) | 90.2 (89.3-91.2) |
| 2018 | 77.5 (77.1-77.9) | 90.7 (89.7-91.6) |
| 2019 | 74 (73.6-74.3) | 88.7 (87.8-89.7) |
| 2020 | 88.4 (88-88.8) | 102.2 (101.2-103.2) |
| Total | 77 (76.9-77.1) | 79.3 (79.1-79.5) |


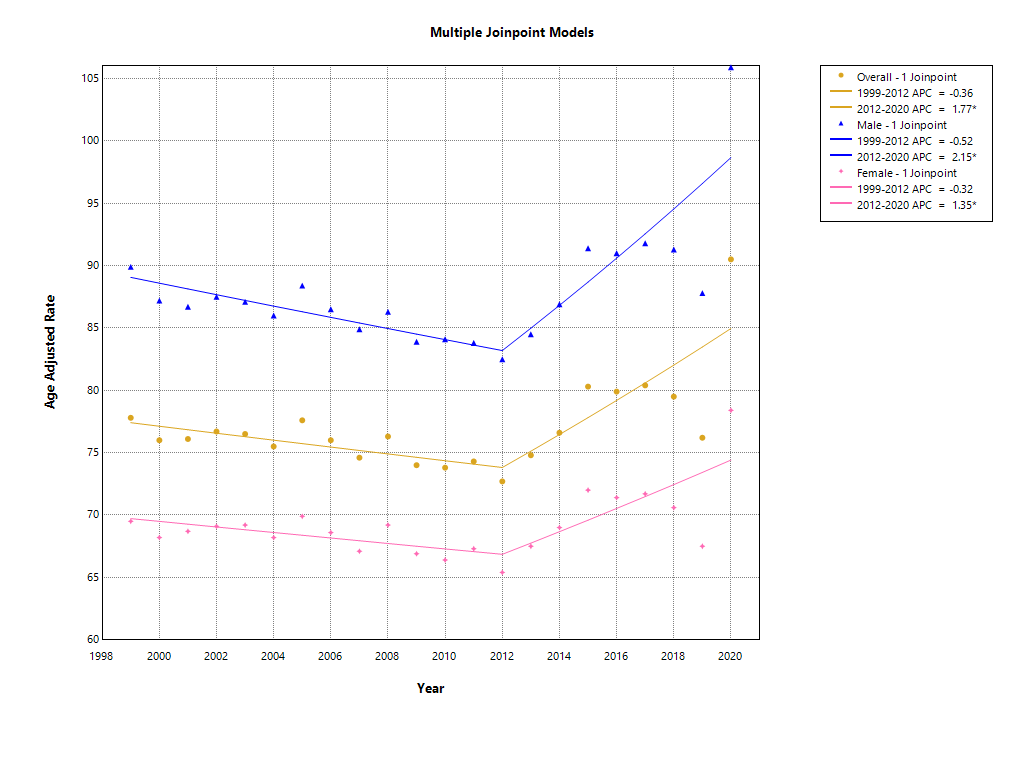


**Supplementary figure 1:** Joinpoint graph showing overall trends stratified by gender for Septicemia related mortality in the US adults from 1999 to 2020


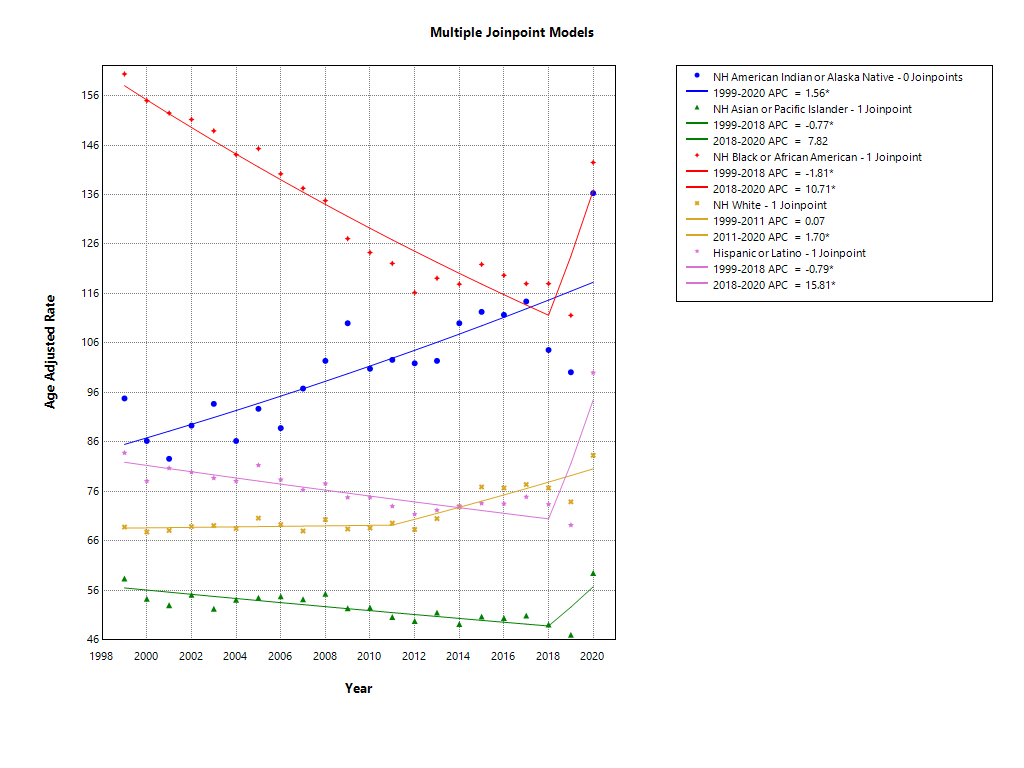


**Supplementary figure 2:** Joinpoint graph showing overall trends stratified by race for septicemia related mortality in the US adults from 1999 to 2020


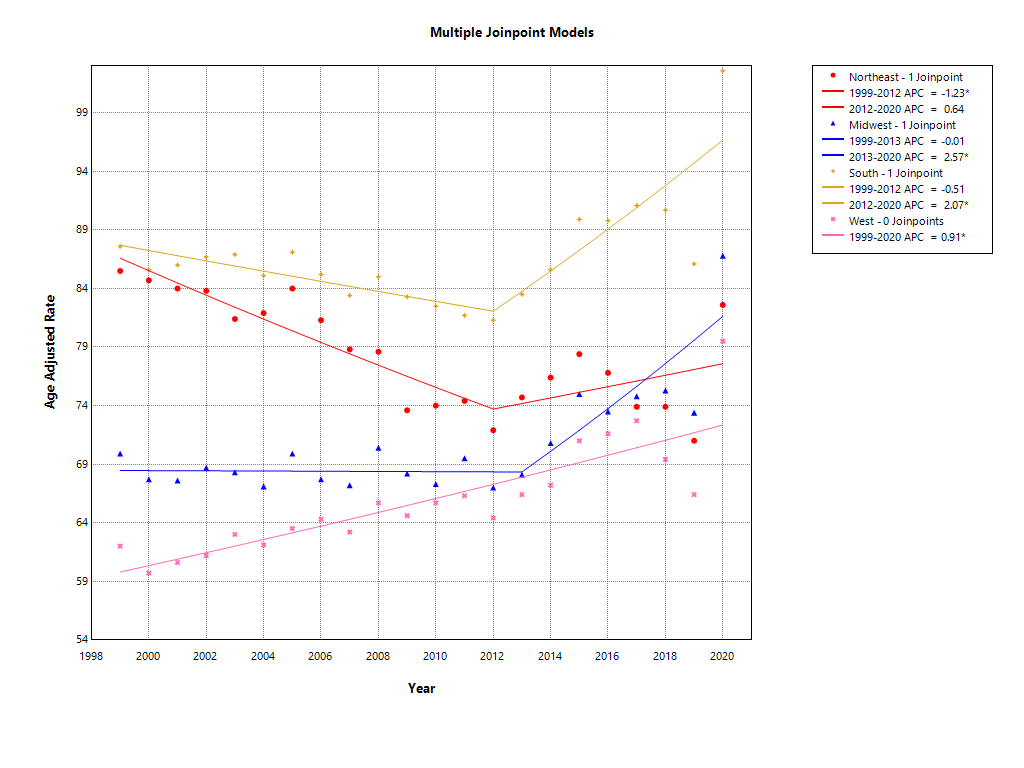


**Supplementary figure 3:** Joinpoint graph showing overall trends stratified by census region for septicemia related mortality in the US adults from 1999 to 2020


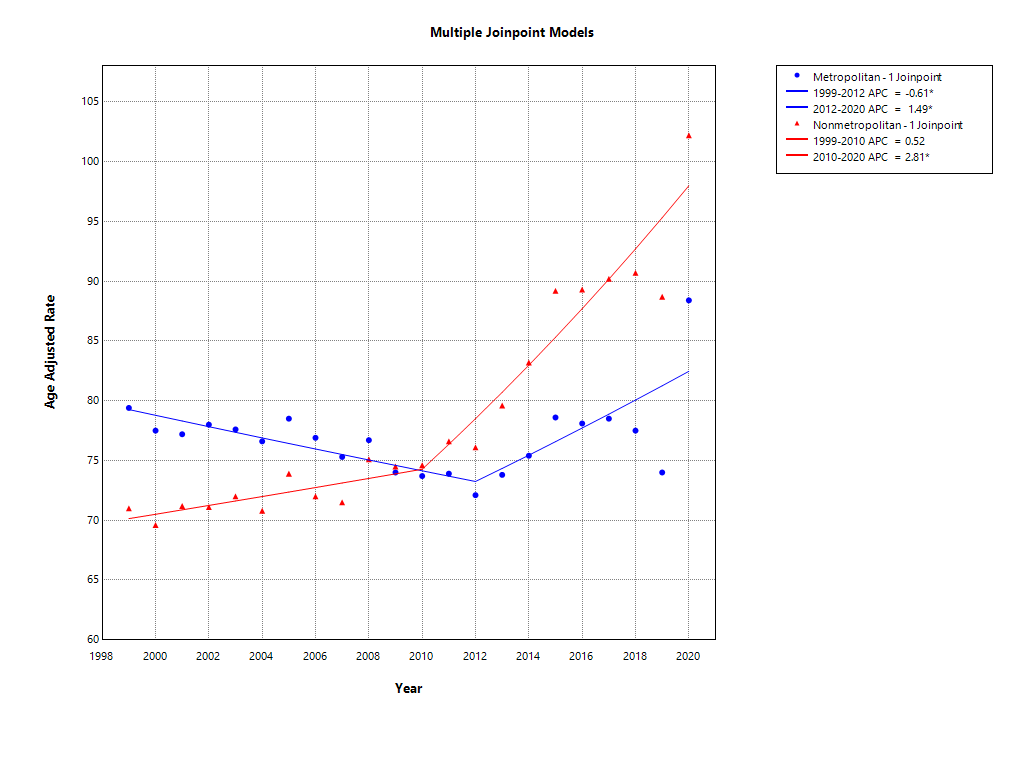
**Supplementary figure 4:** Joinpoint graph showing overall trends stratified by Urbanization for septicemia related mortality in the US adults from 1999 to 2020
